# Supplementary material
Source: PubMed Central journal article supplement (PMC5679405)
Supplement: NIHMS901009-supplement-1.pdf [file NIHMS901009-supplement-1.pdf]

Barik et al., Figure S 1

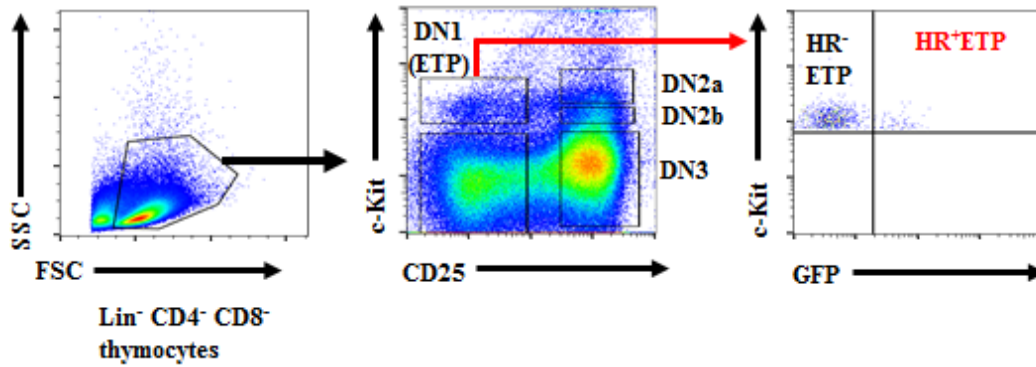

Figure S1. Strategy for isolation of ETPs.

Thymic cells from IL-13R $\alpha$ 1-GFP reporter mice were depleted of lineage-positive ( $\text{Lin}^+$ ) cells including  $\text{CD4}^+$ ,  $\text{CD8}\alpha^+$ ,  $\text{CD11b}^+$ ,  $\text{CD11c}^+$ ,  $\text{CD19}^+$ ,  $\text{B220}^+$ ,  $\text{CD49b}^+$ ,  $\text{CD105}^+$ ,  $\text{MHCII}^+$ ,  $\text{Ter-119}^+$ , and  $\text{TCR}\gamma/\delta$ . The  $\text{Lin}^-$  cells were then gated on  $\text{c-Kit}^+ \text{CD25}^-$  as double negative ( $\text{CD4}^- \text{CD8}^-$ ) 1 (DN1) cells. These are referred to as early thymic progenitors (ETPs) and were further gated on on the basis of GFP expression and sorted into  $\text{HR}^+$  (GFP<sup>+</sup>) or  $\text{HR}^-$  (GFP<sup>-</sup>) ETPs.

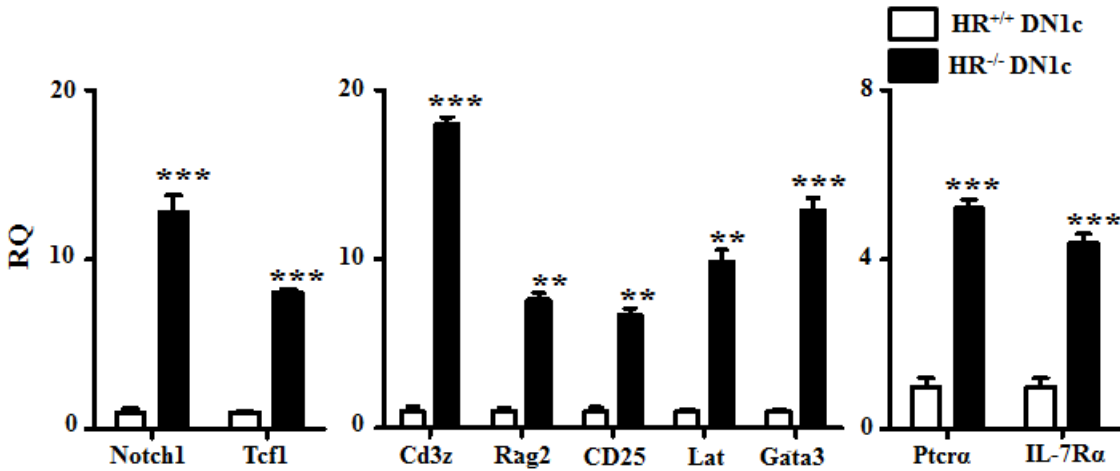

Figure S2. Expression of HR reduces T cell potential in thymic DN1c subsets.

DN1c cells from HR<sup>+/+</sup> and HR<sup>-/-</sup> mice were analysed for mRNA expression of genes associated with T-cell lineage potential. The data shows the relative mRNA quantity (RQ) normalized to GAPDH housekeeping gene. The bars represent mean RQ  $\pm$  SD for the indicated genes compiled from 3 independent experiments. \*\* $p < 0.01$ , and \*\*\* $p < 0.001$  as determined by two-tailed, unpaired Student's t-test from 3 independent experiments.

Barik et al., Figure S3

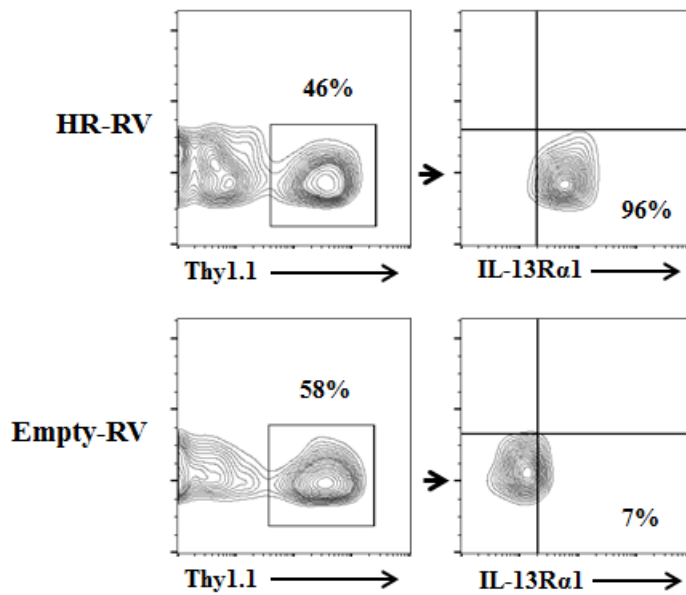

Figure S3. Restoration of HR expression in ETPs by retroviral transduction.

ETPs from HR<sup>-/-</sup> mice were transduced with murine stem cell virus (MSCV) containing Thy1.1 reporter gene alone or together with IL-13Rα1 gene. The MSCV-Thy1.1 retroviral vector is referred to as empty RV and the MSCV-Thy1.1-IL-13Rα1 is designated as HR-RV. The transduced cells are then tested for HR and Thy1.1 expression by staining with anti-IL-13Rα1 and anti-Thy1.1 antibodies.

Barik et al., Figure S4

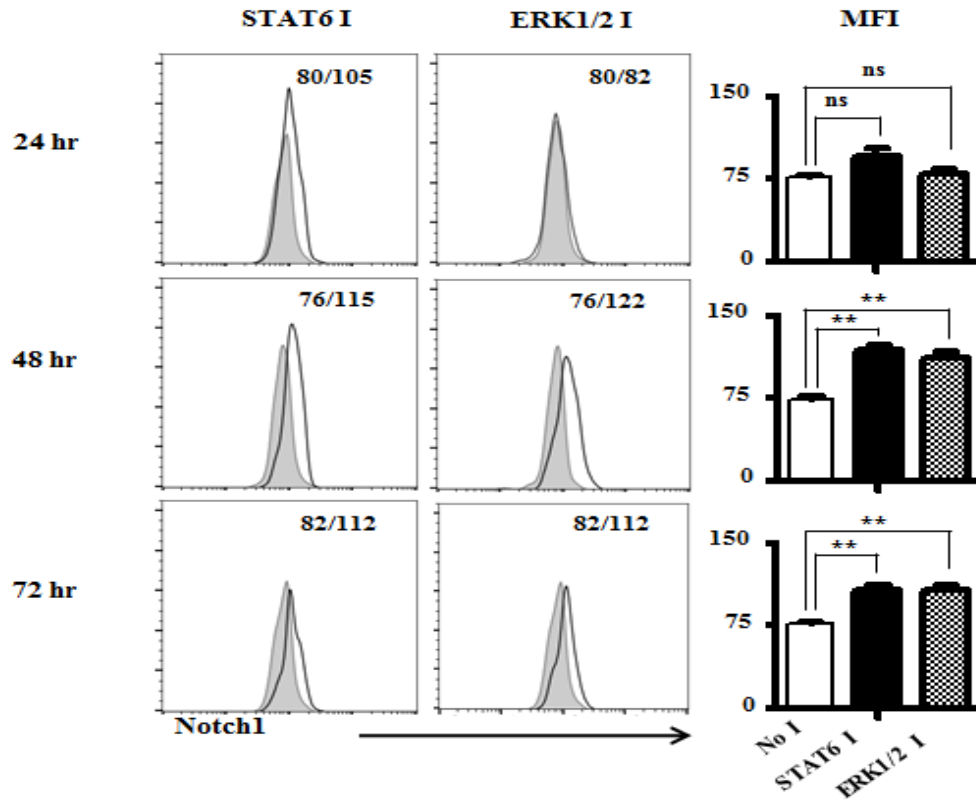

Figure S4. Inhibition of STAT6 activation rescues Notch1 expression in HR<sup>+</sup> ETPs.

Lin<sup>-</sup> CD4<sup>-</sup> CD8<sup>-</sup> thymocytes were isolated from IL-13R $\alpha$ 1-GFP reporter mice and treated with either STAT6 or ERK1/2 inhibitor for the indicated period of time. The cells were then stained with antibodies to CD25, CD44, c-Kit, and Notch1. The CD25<sup>-</sup>CD44<sup>+</sup>c-Kit<sup>+</sup>GFP<sup>+</sup>(HR<sup>+</sup>) ETPs were analyzed for Notch1 expression by flow cytometry. The shaded (no inhibitor) and open (with inhibitor) histograms show representative experiments and the bar graphs show the mean  $\pm$  SD MFI results compiled from three independent experiments. \*\* $p$ <0.01 as determined by one way ANOVA.
